# Supplementary material
Source: publisher figshare collection journal article supplement (https://springernature.figshare.com/ndownloader/files/30772732)
Supplement: Supplementary file [file 30772732]

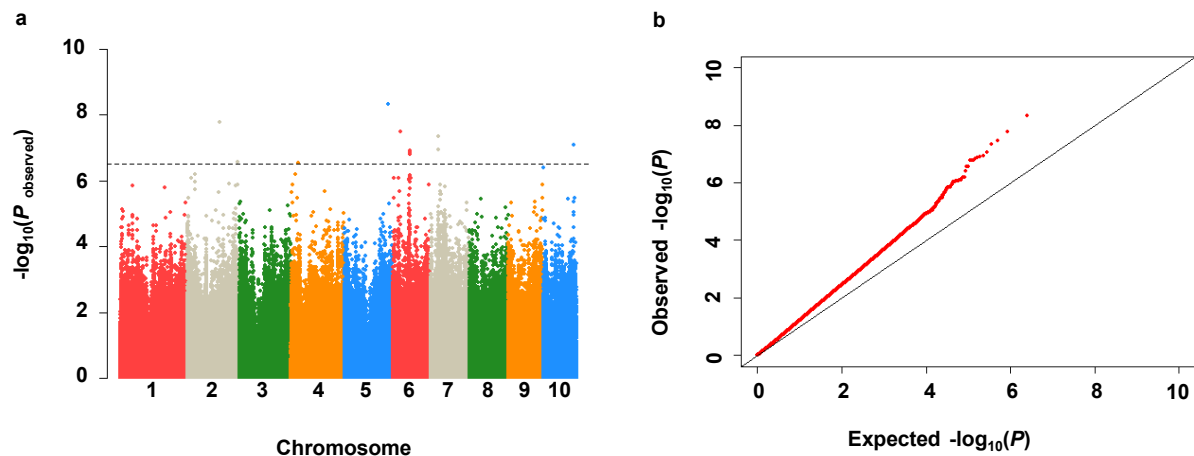

**Figure S1. GWAS showing significant  $P$ -values associated with root hair length based on the general linear model (GLM).**

(a) Manhattan plots of GLM for root hair length. The horizontal dashed line represents the significance threshold  $-\log_{10}(P) = 6.5$ .

(b) QQ plot of GLM showing the ratio of the observed and the expected  $P$ -values for root hair length. The solid diagonal lines represent agreement between observed and expected probability distributions assuming null SNP-trait association.
